# Supplementary material for: DNA Methylation Signatures of Breastfeeding in Buccal Cells Collected in Mid-Childhood
Source: MDPI journal article supplement (doi:10.3390/nu11112804), 2019-11-17
Supplement: s1 [file s1]

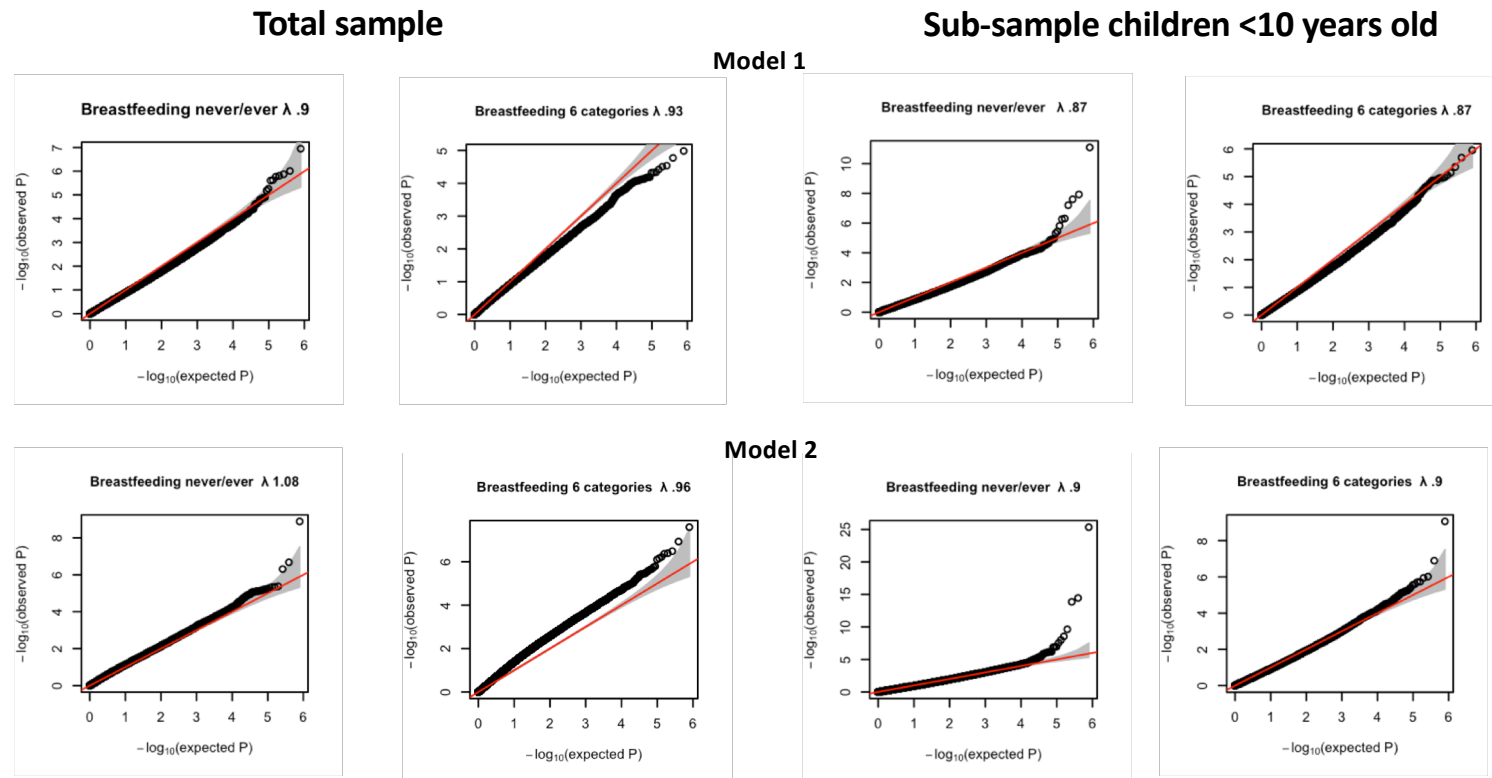

**Supplemental Figure S1.** QQ plots that shows epigenome-wide association study results of breastfeeding ‘never’/‘ever’ and breastfeeding duration in 6 categories (not-breastfed; <2 weeks; 2-6 weeks; 6 weeks – 3 months; > 6 months) in discovery total sample (N=1,006) and in sub-sample of children before 10 years (N = 517). Model adjusted by sex, age, epithelium cells and NK counts and technical covariates (Model 1), adjusted for SES, maternal pre-pregnancy BMI, maternal age at birth, maternal prenatal smoking, and gestational age (Model 2).

Breastfeeding "never" / "ever"

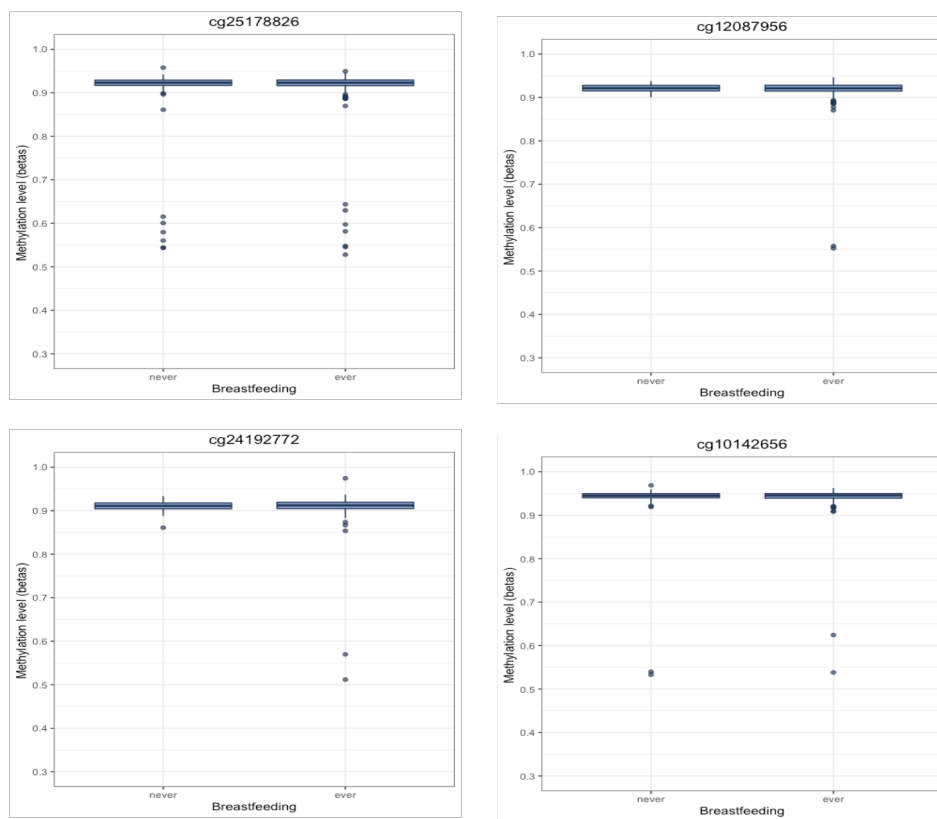

Breastfeeding 6 categories

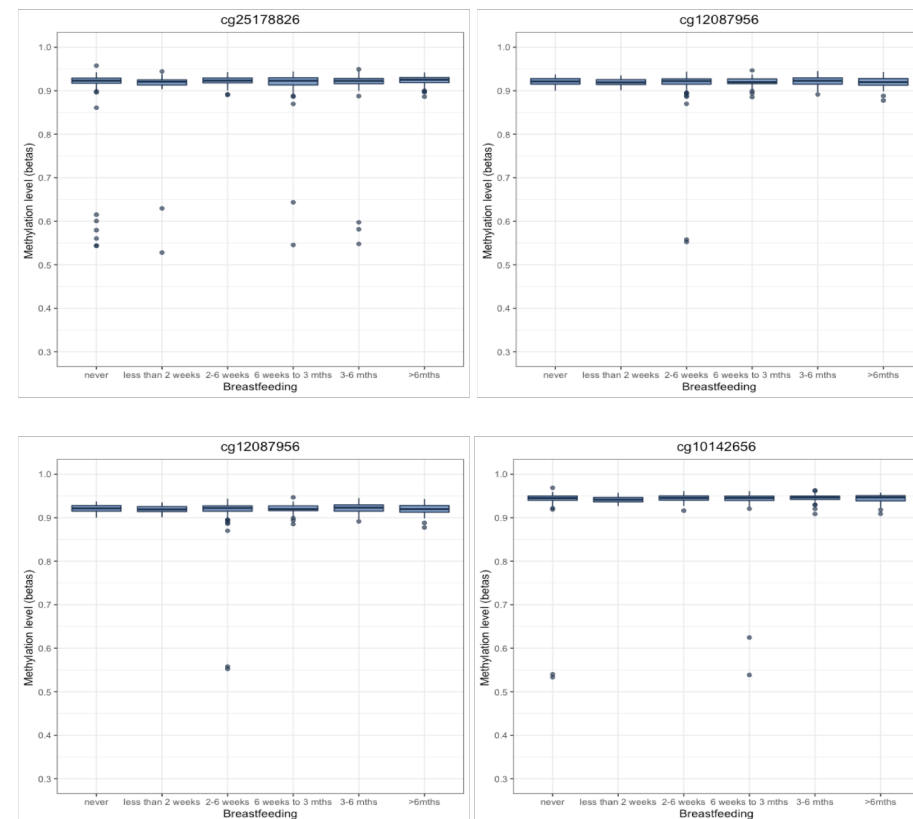

Supplemental Figure S2. Methylation level (beta) at significant CpGs in Model 1 in sub-sample of children <10 years (N = 517)

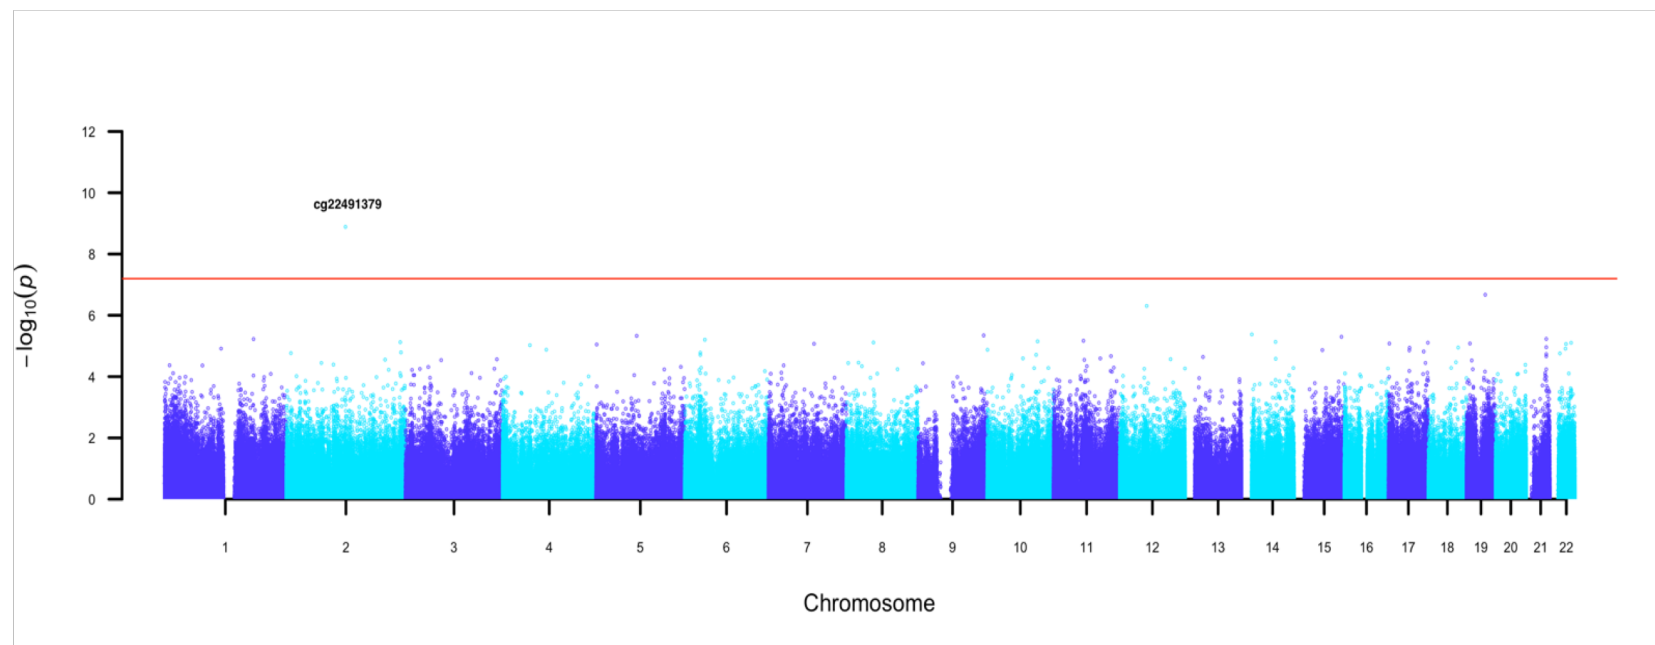

**Supplemental Figure S3.** Manhattan plot show the epigenome-wide association study results of breastfeeding ‘never’/‘ever’ in discovery sample ( $n = 1,006$ ). Breastfeeding as exposure is adjusted by sex, age, SES, maternal age at delivery, maternal pre-pregnancy BMI, maternal prenatal smoking, gestational age, and cell composition (adjusted model 2). In the Manhattan plot, the red line represents Bonferroni threshold ( $6.34e-08$ ). Given CpG name indicates loci after outliers removal

Breastfeeding "never" / "ever"

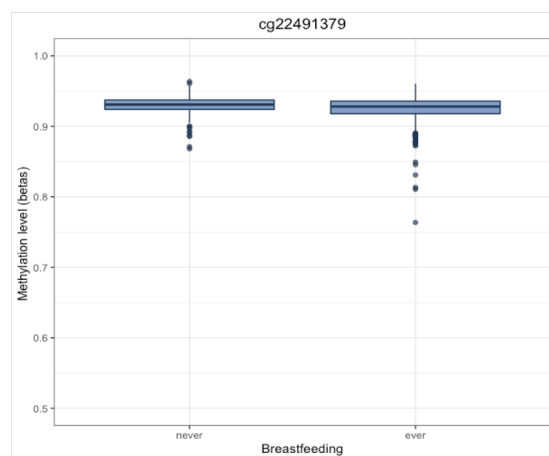

Breastfeeding 6 categories

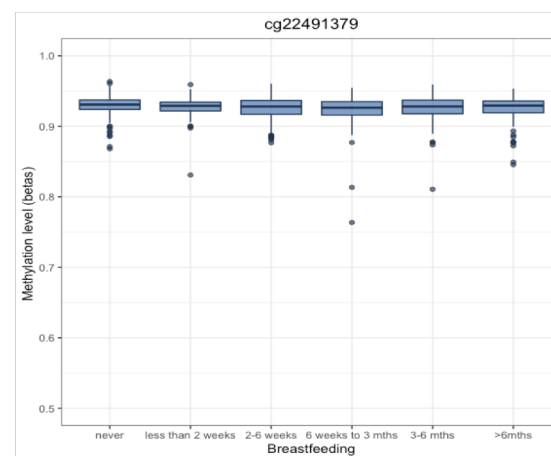

**Supplemental Figure S4.** Methylation level (beta) at significant CpG in Model 2 in total sample (N = 1,006)

Breastfeeding "never" / "ever"

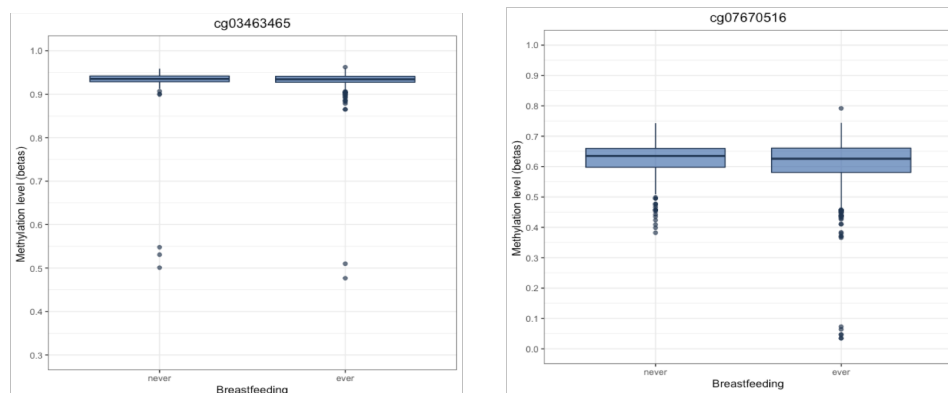

Breastfeeding 6 categories

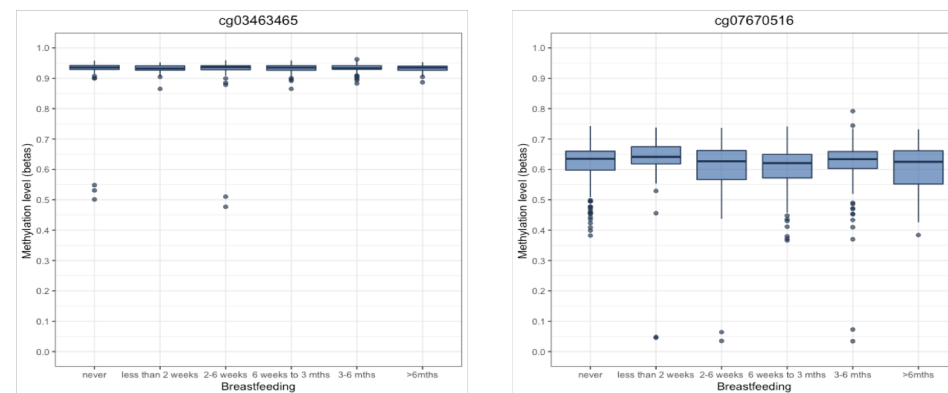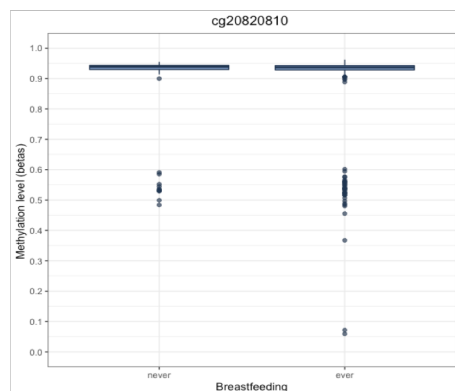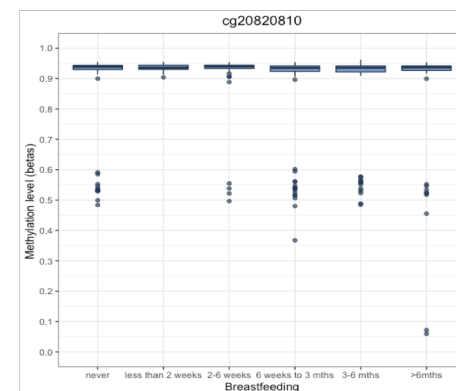

**Supplemental Figure S5.** Methylation level (beta) at significant CpGs in Model 2 in sub-sample of children <10 years (N = 517) with outliers excluded from further replication

Breastfeeding "never" / "ever"

Breastfeeding 6 categories

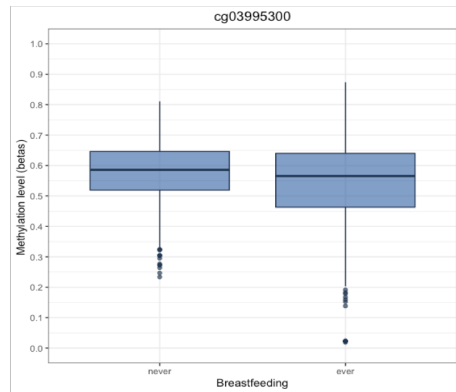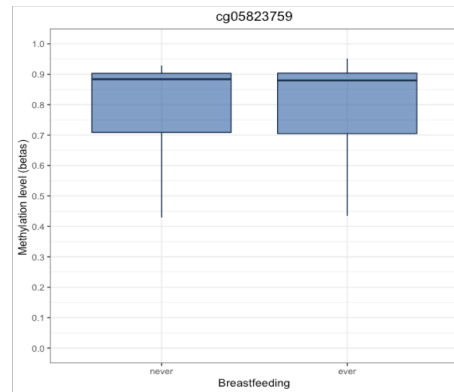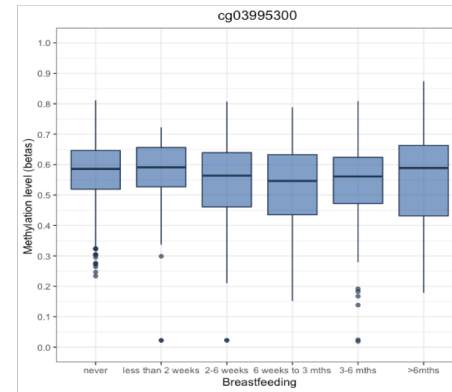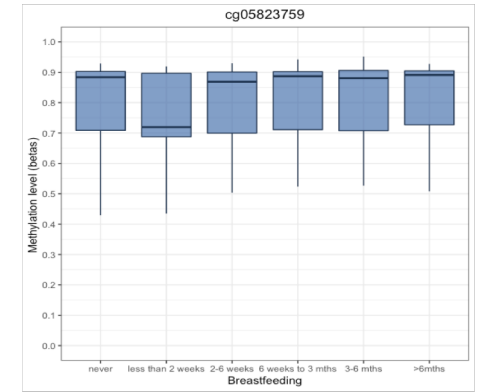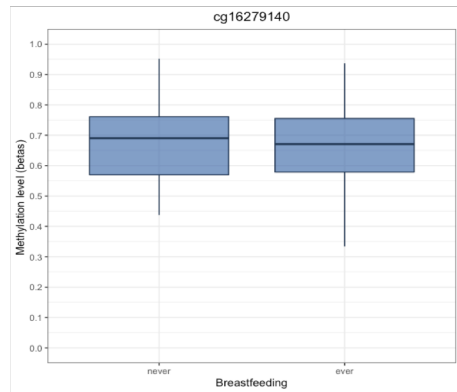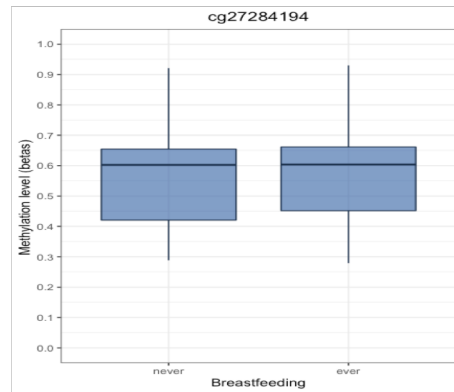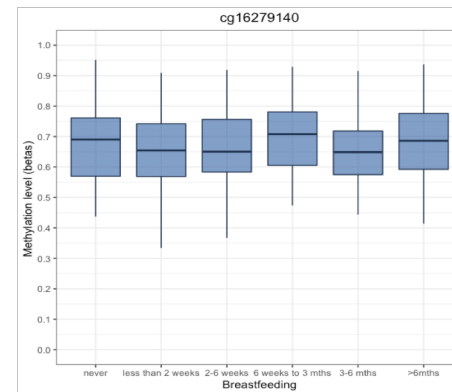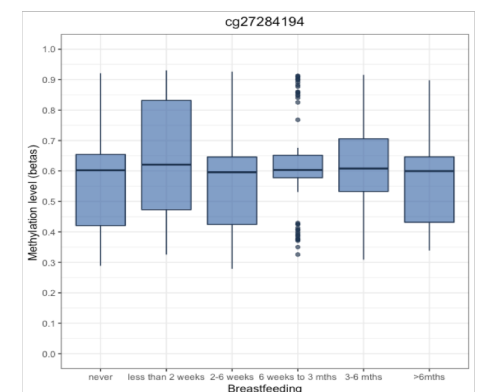

**Supplemental Figure S6.** Methylation level (beta) at significant CpGs in Model 2 in sub-sample of children <10 years included in replication study

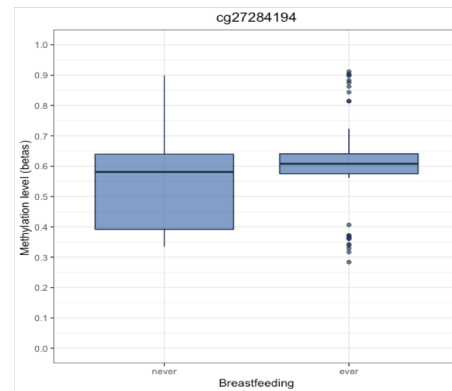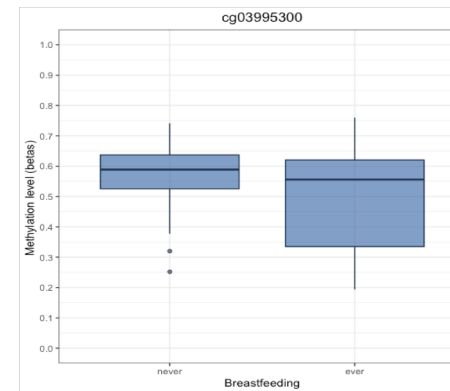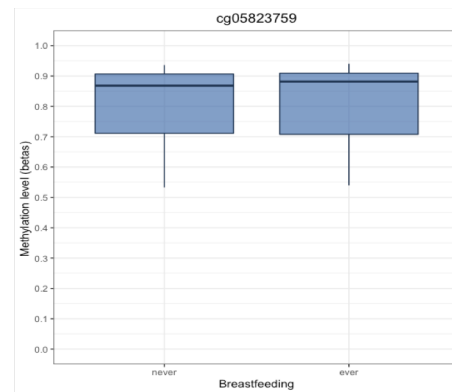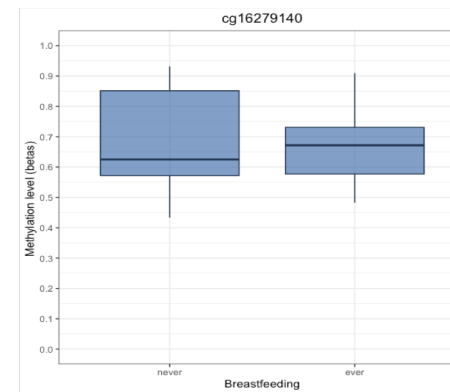

**Supplemental Figure S7.** Methylation level (beta) at significant CpGs in Model 2 in NTR replication study (N =100)
